# Supplementary material
Source: PubMed Central journal article supplement (PMC3096517)
Supplement: Suppl_Data.pdf [file Suppl_Data.pdf]

## Supplementary Data

SUPPLEMENTARY TABLE S1. POSTMORTEM CYSTATHIONINE  $\beta$ -SYNTHASE ACTIVITY IN BRAIN TISSUE OF NORMAL INDIVIDUALS AND ALZHEIMER'S DISEASE PATIENTS

| <i>Patient ID</i> | <i>Diagnosis</i> | <i>Sex</i> | <i>Age (years)</i> | <i>Postmortem time (h)</i> | <i>FC CBS activity</i> | <i>FC Wb analysis</i> | <i>Cb CBS activity</i> | <i>Cb Wb analysis</i> |
|-------------------|------------------|------------|--------------------|----------------------------|------------------------|-----------------------|------------------------|-----------------------|
| 1                 | Normal           | M          | 91                 | 8                          | +                      | +                     | +                      | +                     |
| 2                 | Normal           | F          | 86                 | 18                         | +                      | +                     | +                      | +                     |
| 3                 | Normal           | F          | 95                 | 18                         | +                      |                       | +                      |                       |
| 4                 | Normal           | M          | 81                 | 6                          | +                      |                       | +                      | +                     |
| 5                 | Normal           | M          | 77                 | 17                         | +                      | +                     | +                      |                       |
| 11                | Normal           | F          | 48                 | 5                          | +                      | +                     | +                      | +                     |
| 12                | Normal           | M          | 73                 | 7                          | +                      | +                     | +                      | +                     |
| 13                | Normal           | F          | 73                 | 13.5                       | +                      | +                     | +                      | +                     |
| 14                | Normal           | M          | 73                 | 18                         |                        |                       | +                      |                       |
| 15                | Normal           | M          | 70                 | 20.5                       | +                      | +                     | +                      | +                     |
| 16                | Normal           | M          | 72                 | 23                         | +                      | +                     | +                      | +                     |
| 17                | Normal           | M          | 83                 | 28                         |                        |                       | +                      |                       |
| 6                 | AD               | M          | 90                 | 3                          | +                      | +                     | +                      | +                     |
| 7                 | AD               | F          | 82                 | 6                          | +                      |                       | +                      |                       |
| 8                 | AD               | M          | 75                 | 7                          | +                      | +                     | +                      |                       |
| 9                 | AD               | M          | 83                 | 7                          | +                      |                       | +                      | +                     |
| 10                | AD               | F          | 89                 | 20                         | +                      | +                     | +                      | +                     |
| 18                | AD               | M          | 73                 | 3                          | +                      | +                     | +                      | +                     |
| 19                | AD               | M          | 83                 | 7                          | +                      | +                     | +                      | +                     |
| 20                | AD               | M          | 77                 | 7.75                       |                        |                       | +                      |                       |
| 21                | AD               | M          | 76                 | 8                          |                        |                       | +                      |                       |
| 22                | AD               | F          | 75                 | 8                          |                        |                       | +                      |                       |
| 23                | AD               | F          | 78                 | 8                          |                        |                       | +                      |                       |
| 24                | AD               | M          | 83                 | 8                          |                        |                       | +                      |                       |
| 25                | AD               | F          | 66                 | 9                          | +                      | +                     | +                      | +                     |
| 26                | AD               | F          | 94                 | 9                          |                        |                       | +                      |                       |
| 27                | AD               | M          | 65                 | 11                         | +                      | +                     | +                      | +                     |
| 28                | AD               | F          | 78                 | 24                         | +                      | +                     | +                      | +                     |

AD, Alzheimer's disease; CBS, cystathionine  $\beta$ -synthase; Fc, Frontal cortex; Cb, Cerebellum; Wb, Western blst.
